# Supplementary material for: Unscheduled DNA synthesis leads to elevated uracil residues at highly transcribed genomic loci in Saccharomyces cerevisiae
Source: PubMed Central journal article supplement (PMC6063437; doi:10.1371/journal.pgen.1007516), 2018-07-17
Supplement: pgen.1007516.s001.pdf [file pgen.1007516.s001.pdf]

**Table S1: Mutation Rates and Spectra at the *lys2-TAG* allele in the *apn1*Δ strain.**

|                     | T | A | G | Mutation Rate $\times 10^{-8}$<br>(95% confidence interval) | N  |
|---------------------|---|---|---|-------------------------------------------------------------|----|
|                     | a | A | G | 2.92                                                        | 2  |
|                     | c | A | G | 2.92                                                        | 2  |
| Mutated<br>sequence | g | A | G | 8.75                                                        | 6  |
|                     | T | c | G | 53.9                                                        | 37 |
|                     | T | A | c | 1.46                                                        | 1  |
| <b>Total</b>        |   |   |   | 70 (58.5 – 93.8)                                            | 48 |

Mutated bases are indicated in lower case letters. Uracil-associated and cytosine-associated mutations are highlighted in yellow and blue, respectively.
