# Supplementary material for: Unscheduled DNA synthesis leads to elevated uracil residues at highly transcribed genomic loci in Saccharomyces cerevisiae
Source: PubMed Central journal article supplement (PMC6063437; doi:10.1371/journal.pgen.1007516), 2018-07-17
Supplement: pgen.1007516.s002.pdf [file pgen.1007516.s002.pdf]

**Table S2: Mutation Rates, Mutation Spectra and Fold Change following CDG expression**

| Relevant Genotype            | Mutation Rate (x10 <sup>-8</sup> ) | High rate* (95%CI)  | N*** (High) | Low rate** (95% CI) | N*** (Low) | Rate ratio (High/Low) |
|------------------------------|------------------------------------|---------------------|-------------|---------------------|------------|-----------------------|
| <i>apn1 ung1</i>             | Overall                            | 18.3<br>(15-21.8)   | 91          | 2.57<br>(2.11-2.8)  | 56         | 7.12                  |
|                              | A>C                                | 3.3                 | 25          | 0.78                | 17         | 4.2                   |
|                              | T>G                                | 5.14                | 39          | 0.46                | 10         | 11.2                  |
|                              | A>C + T>G                          | 12.9                | 64          | 1.24                | 27         | 10.4                  |
|                              | G>C                                | 0.92                | 7           | 0.55                | 12         | 1.67                  |
|                              | Other                              | 4.02                | 20          | 0.78                | 17         | 5.15                  |
| <i>apn1 ung1 rad14</i>       | Overall                            | 38.7<br>(36.8-41.9) | 92          | 4.61<br>(3.99-6.17) | 67         | 8.4                   |
|                              | A>C                                | 18.1                | 43          | 1.58                | 23         | 11.5                  |
|                              | T>G                                | 1.68                | 4           | 0.34                | 5          | 4.94                  |
|                              | A>C + T>G                          | 19.8                | 47          | 1.93                | 28         | 10.24                 |
|                              | G>C                                | 5.05                | 12          | 1.99                | 29         | 2.53                  |
|                              | Other                              | 13.9                | 33          | 0.68                | 10         | 20.4                  |
| <i>apn1 ung1 top1</i>        | Overall                            | 16.8<br>(14.5-17.8) | 80          | 2.14<br>(1.63-2.62) | 55         | 7.85                  |
|                              | A>C                                | 4.41                | 21          | 0.27                | 7          | 16.3                  |
|                              | T>G                                | 4.41                | 21          | 0.16                | 4          | 27.56                 |
|                              | A>C + T>G                          | 8.82                | 42          | 0.43                | 11         | 20.8                  |
|                              | G>C                                | 2.94                | 14          | 1.17                | 30         | 2.52                  |
|                              | Other                              | 5.04                | 24          | 0.97                | 25         | 5.19                  |
| <i>apn1 ung1 rad14 top1</i>  | Overall                            | 40.8<br>(35-45)     | 86          | 5.03<br>(4.49-5.81) | 65         | 7.95                  |
|                              | A>C                                | 18.03               | 38          | 0.31                | 4          | 58.2                  |
|                              | T>G                                | 3.8                 | 8           | 0.62                | 8          | 6.12                  |
|                              | A>C + T>G                          | 21.8                | 46          | 0.93                | 12         | 23.44                 |
|                              | G>C                                | 7.11                | 15          | 0.93                | 12         | 7.64                  |
|                              | Other                              | 11.9                | 25          | 3.17                | 41         | 3.74                  |
| <i>apn1 ung1 rnh1 rnh201</i> | Overall                            | 12.7<br>(9.14-14.8) | 77          | 2.01<br>(1.52-2.41) | 75         | 6.32                  |
|                              | A>C                                | 1.81                | 11          | 0.40                | 15         | 4.5                   |
|                              | T>G                                | 3.13                | 19          | 0.08                | 3          | 39.13                 |
|                              | A>C + T>G                          | 4.95                | 30          | 0.48                | 18         | 10.3                  |
|                              | G>C                                | 2.64                | 16          | 0.75                | 28         | 3.52                  |
|                              | Other                              | 5.11                | 31          | 0.78                | 29         | 6.55                  |

\*Rates of mutations under high transcription conditions (no doxycycline)

\*\*Rates of mutations under low transcription conditions (2µg/mL doxycycline)

\*\*\*Rates of specific mutation types were calculated by multiplying the overall rate by the proportion of the relevant mutation type in the corresponding spectrum.
