# Supplementary material for: Unscheduled DNA synthesis leads to elevated uracil residues at highly transcribed genomic loci in Saccharomyces cerevisiae
Source: PubMed Central journal article supplement (PMC6063437; doi:10.1371/journal.pgen.1007516), 2018-07-17
Supplement: pgen.1007516.s003.pdf [file pgen.1007516.s003.pdf]

**Table S3: Uracil Quantitation Using Long-Amplicon QPCR**

| Conditions                    | LYS2 3KB        |                | LYS2 4KB        |                |
|-------------------------------|-----------------|----------------|-----------------|----------------|
|                               | % amplification | Uracil Density | % amplification | Uracil Density |
| <b><i>ung1</i> + 0uM 5FU</b>  | 73.5±6.7        | 1.01±0.29      | 73.2±13         | 1.03±0.42      |
| <b><i>ung1</i> + 1uM 5FU</b>  | 78.1±2.8        | 0.81±0.122     | 61.7±4.0        | 1.17±0.16      |
| <b><i>ung1</i> + 5uM 5FU</b>  | 51.6±6.1        | 2.18±0.39      | 42.3±4.2        | 2.08±0.26      |
| <b><i>ung1</i> + 10uM 5FU</b> | 49.0±5.1        | 2.34±0.34      | 29.3±5.6        | 3.01±0.45      |

| Primers         | WT         |            | <i>ung1</i> |           | <i>ung1 dcd1</i> |           |
|-----------------|------------|------------|-------------|-----------|------------------|-----------|
|                 | -dox       | +dox       | -dox        | +dox      | -dox             | +dox      |
| <b>LYS2 3KB</b> | 0.451±0.18 | 0.072±0.11 | 1.53±0.18   | 0.93±0.11 | 2.05±0.26        | 1.13±0.18 |
| <b>LYS2 4KB</b> | 0.526±0.27 | 0.21±0.22  | 1.31±0.20   | 0.64±0.29 | 2.09±0.34        | 1.35±0.22 |
| <b>CAN1 3KB</b> | 0.245±0.21 | 0.16±0.18  | 0.26±0.155  | 0.36±0.37 | 1.38±0.41        | 1.34±0.37 |
| <b>TDH3 3KB</b> | 0.404±0.21 | 0.51±0.21  | 0.975±0.35  | 1.20±0.69 | 1.6±0.24         | 1.62±0.30 |
