# Supplementary material for: Unscheduled DNA synthesis leads to elevated uracil residues at highly transcribed genomic loci in Saccharomyces cerevisiae
Source: PubMed Central journal article supplement (PMC6063437; doi:10.1371/journal.pgen.1007516), 2018-07-17
Supplement: pgen.1007516.s004.pdf [file pgen.1007516.s004.pdf]

**Table S4: Mutation Frequencies Following Drug Treatment.**

|                            |          | <b>DMSO (12 cultures)*</b>                       |                        | <b>5-FU (12 cultures)*</b>                       |                        |
|----------------------------|----------|--------------------------------------------------|------------------------|--------------------------------------------------|------------------------|
|                            |          | Mutation Frequency<br>x10 <sup>-8</sup> (95% CI) | # of Lys+<br>sequenced | Mutation Frequency<br>x10 <sup>-8</sup> (95% CI) | # of Lys+<br>sequenced |
| WT                         | Overall  | 2.17 (1.5-3.3)                                   | 84                     | 2.26 (0.65-5.48)                                 | 32                     |
|                            | Uracil** | 0.8 (0.32-1.99)                                  | 31                     | 1.6 (0.39-3.90)                                  | 16                     |
| <i>ung1</i>                | Overall  | 4.90 (1.8-7.26)                                  | 30                     | 1.98 (1.32-8.25)                                 | 34                     |
|                            | Uracil** | 0.65 (0.5-1.6)                                   | 4                      | 0.48 (0.21-2.04)                                 | 10                     |
| <i>apn1</i>                | Overall  | 16.9 (6.5-29.4)                                  | 86                     | 89.2 (57-102)                                    | 72                     |
|                            | Uracil** | 15.7 (5.95-27.4)                                 | 80                     | 83 (52-95)                                       | 67                     |
| <i>apn1</i><br><i>ung1</i> | Overall  | 3.93 (2.5-4.64)                                  | 44                     | 3.66 (2.33-4.66)                                 | 50                     |
|                            | Uracil** | 1.61 (0.8-2.29)                                  | 16                     | 2.10 (1.17-2.89)                                 | 23                     |
|                            |          | <b>DMSO (24 cultures)*</b>                       |                        | <b>CPT (24 cultures)*</b>                        |                        |
|                            |          | Mutation Frequency<br>x10 <sup>-8</sup> (95% CI) | # of Lys+<br>sequenced | Mutation Frequency<br>x10 <sup>-8</sup> (95% CI) | # of Lys+<br>sequenced |
| WT                         | Overall  | 0.51 (0.25-0.75)                                 | 84                     | 1.6 (0.97-1.7)                                   | 46                     |
|                            | Uracil** | 0.19(0.1-0.3)                                    | 31                     | 0.73 (0.36-0.97)                                 | 21                     |
| <i>ung1</i>                | Overall  | 0.57(0.45-0.92)                                  | 30                     | 1.91 (1.6-3.19)                                  | 54                     |
|                            | Uracil** | 0.08 (0.02-0.23)                                 | 4                      | 0.6(0.36-1.08)                                   | 17                     |
| <i>apn1</i>                | Overall  | 2 (1.56-2.89)                                    | 86                     | 6.95 (5.83-11.4)                                 | 97                     |
|                            | Uracil** | 1.86 (1.42-2.69)                                 | 80                     | 4.51 (3.47-7.47)                                 | 77                     |
| <i>apn1</i><br><i>ung1</i> | Overall  | 0.95 (0.71-1.19)                                 | 44                     | 2.76 (1.38-5.52)                                 | 98                     |
|                            | Uracil** | 0.37 (0.21-0.54)                                 | 16                     | 0.87 (0.37-1.79)                                 | 31                     |
|                            |          | <b>DMSO (24 cultures)*</b>                       |                        | <b>4NQO (24 cultures)*</b>                       |                        |
|                            |          | Mutation Frequency<br>x10 <sup>-8</sup> (95% CI) | # of Lys+<br>sequenced | Mutation Frequency<br>x10 <sup>-8</sup> (95% CI) | # of Lys+<br>sequenced |
| WT                         | Overall  | 1 (0.5-2.0)                                      | 84                     | 55.8 (39.9-70)                                   | 133                    |
|                            | Uracil** | 0.37 (0.15-0.75)                                 | 31                     | 7.97 (4.24-12.5)                                 | 19                     |
| <i>ung1</i>                | Overall  | 0.99 (0.49-1.02)                                 | 30                     | 44.8 (37.3-46.4)                                 | 123                    |
|                            | Uracil** | 0.132 (0.02-0.38)                                | 4                      | 5.46 (2.96-8.78)                                 | 14                     |
| <i>apn1</i>                | Overall  | 7.93 (2.64-11.6)                                 | 86                     | 122 (83-166)                                     | 168                    |
|                            | Uracil** | 7.38 (2.4-10.8)                                  | 80                     | 29.8 (17-44)                                     | 41                     |
| <i>apn1</i><br><i>ung1</i> | Overall  | 1.16 (1.74-0.58)                                 | 44                     | 59.4 (33-81.4)                                   | 146                    |
|                            | Uracil** | 0.47 (0.187-0.78)                                | 16                     | 7.32 (3.02-12.1)                                 | 18                     |

\*Numbers of the cultures used to determine the mutation frequencies.

\*\*The frequencies of uracil-dependent mutations were determined by multiplying the proportion of the A>C and T>G mutations with the overall mutation frequencies.
