# Supplementary material for: Unscheduled DNA synthesis leads to elevated uracil residues at highly transcribed genomic loci in Saccharomyces cerevisiae
Source: PubMed Central journal article supplement (PMC6063437; doi:10.1371/journal.pgen.1007516), 2018-07-17
Supplement: pgen.1007516.s005.pdf [file pgen.1007516.s005.pdf]

**Table S5: The quantitation of Cy5 Signal following Drug Treatments**

|                            | <b>Relative Cy5 signal<br/>N=6 (<math>\pm</math> standard deviation)</b> |
|----------------------------|--------------------------------------------------------------------------|
| <i>ung1</i> + DMSO         | 1 $\pm$ 0.000                                                            |
| <i>ung1</i> + 10uM 5-FU    | 1.26 $\pm$ 0.145                                                         |
| <i>ung1</i> + 50uM 5-FU    | 1.73 $\pm$ 0.07                                                          |
| <i>ung1</i> + 100uM 5-FU   | 3.42 $\pm$ 0.130                                                         |
| Hela cells                 | 0.63 $\pm$ 0.030                                                         |
| Daudi cells                | 3.68 $\pm$ 0.120                                                         |
|                            |                                                                          |
| <i>ung1</i> + DMSO         | 1 $\pm$ 0.000                                                            |
| <i>ung1</i> + 1ug/mL 4NQO  | 1.1 $\pm$ 0.095                                                          |
| <i>ung1</i> + 5ug/mL 4NQO  | 1.15 $\pm$ 0.235                                                         |
| <i>ung1</i> + 10ug/mL 4NQO | 2.26 $\pm$ 0.325                                                         |
| <i>ung1</i> + 20ug/mL 4NQO | 3.25 $\pm$ 0.495                                                         |
