# Supplementary material for: Unscheduled DNA synthesis leads to elevated uracil residues at highly transcribed genomic loci in Saccharomyces cerevisiae
Source: PubMed Central journal article supplement (PMC6063437; doi:10.1371/journal.pgen.1007516), 2018-07-17
Supplement: pgen.1007516.s006.pdf [file pgen.1007516.s006.pdf]

**Table S6: Mutation Rates at the *pTET-lys2-TAA* in *apn1 ntg1 ntg2* strains following Dut1 Overexpression**

| <b>Galactose + Raffinose<br/>(N= 24 cultures)</b> |                                                            |                                                         |
|---------------------------------------------------|------------------------------------------------------------|---------------------------------------------------------|
|                                                   | Mutation Rate ( $\times 10^{-8}$ )<br>(High Transcription) | Mutation Rate ( $\times 10^{-8}$ )<br>Low Transcription |
| Vector                                            | 180 (149-212)                                              | 2.24 (1.25-2.54)                                        |
| pGal-DUT1                                         | 18.3 (12.5-23.5)                                           | 2.26 (1.51-3.93)                                        |
| G1-DUT1                                           | 94 (77-124)                                                | 2.36 (1.10-3.44)                                        |
| S-DUT1                                            | 124 (100-171)                                              | 2.27 (1.11-2.53)                                        |
| G2-DUT1                                           | 115 (96.2-136)                                             | 1.90 (1.58-2.5)                                         |
| <b>Glycerol + Ethanol<br/>(N=24 cultures)</b>     |                                                            |                                                         |
|                                                   | Mutation Rate ( $\times 10^{-8}$ )<br>(High Transcription) | Mutation Rate ( $\times 10^{-8}$ )<br>Low Transcription |
| Vector                                            | 70.9 (67.2-74)                                             | 2.94 (2.34-4.40)                                        |
| G1-DUT1                                           | 45.2 (37.9 – 50.4)                                         | 2.14 (1.46-3.72)                                        |
| S-DUT1                                            | 54.6 (47-61.7)                                             | 2.96 (2.21-3.26)                                        |
| G2-DUT1                                           | 50 (46.4-60.3)                                             | 2.13 (1.21-5.43)                                        |
