# Supplementary material for: Unscheduled DNA synthesis leads to elevated uracil residues at highly transcribed genomic loci in Saccharomyces cerevisiae
Source: PubMed Central journal article supplement (PMC6063437; doi:10.1371/journal.pgen.1007516), 2018-07-17
Supplement: pgen.1007516.s007.pdf [file pgen.1007516.s007.pdf]

**Table S7: Primers used in quantitative real-time PCR analyses.**

| Primer name       | Forward primer                              | Reverse primer                       | Amplicon Size (nt) |
|-------------------|---------------------------------------------|--------------------------------------|--------------------|
|                   | <b>For Long-Amplicon qPCR<br/>(5' – 3')</b> |                                      |                    |
| <i>LYS2 100bp</i> | GAGTAACCGGTGACGATGATA<br>TT                 | CATTAATGACCACGTTGGTTGA               | 97                 |
| <i>LYS2 3kb</i>   | CTTTCAGTGTTACCACATGA                        | CAAATTTTTCGTTCCAAGTACC               | 3031               |
| <i>LYS2 4kb</i>   | CTTTCAGTGTTACCACATGA                        | GTTCTATACTTGGCAGTGGAAG               | 4045               |
| <i>CAN1 100bp</i> | GAGTTCTGGGTCGCTTCCAT                        | GGCACCTGGGTTTCTCCAAT                 | 120                |
| <i>CAN1 3kb</i>   | CAGTCCTATTCGGAGATACAG                       | CTAACTCAGACATTATCGGAAC               | 3067               |
| <i>TDH3 100bp</i> | CATGGGGTTCTTCCAACGTTG                       | GGAAGATGGAGCAGTGATAAC                | 122                |
| <i>TDH3 3kb</i>   | GTTCTCACAC GGAACACCAC-                      | GTGGCAGCAAGTGATAAGCAAGC              | 3127               |
|                   | <b>For qRT-PCR<br/>(5' – 3')</b>            |                                      |                    |
| <i>DUT1</i>       | GGTTCTGCCACTGCCGCGGG                        | GGCGCAATACGACCGTAGGT                 |                    |
| <i>ALG9</i>       | CACGGATAGTGGCTTTGGTGA<br>ACAATTAC           | TATGATTATCTGGCAGCAGGAAAGA<br>ACTTGGG |                    |
| <i>HTA2</i>       | CCCAGTTGGTAGAGTGACACAG                      | CTCTAGCAGCATTACCAGCC                 |                    |
