# Supplementary material for: Unscheduled DNA synthesis leads to elevated uracil residues at highly transcribed genomic loci in Saccharomyces cerevisiae
Source: PubMed Central journal article supplement (PMC6063437; doi:10.1371/journal.pgen.1007516), 2018-07-17

# Fig. S1

## A. Overall mutation rate

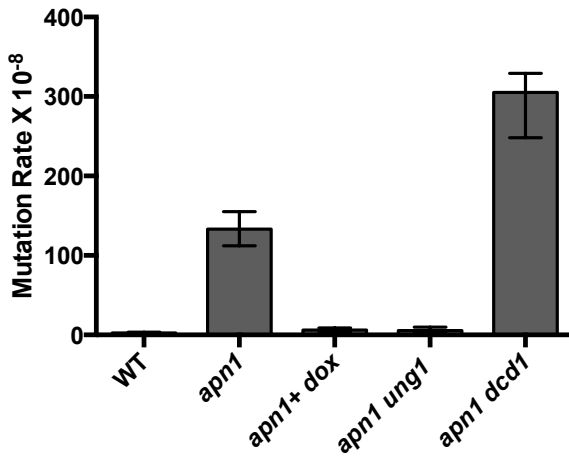

## B. mRNA expression levels +/- doxycycline

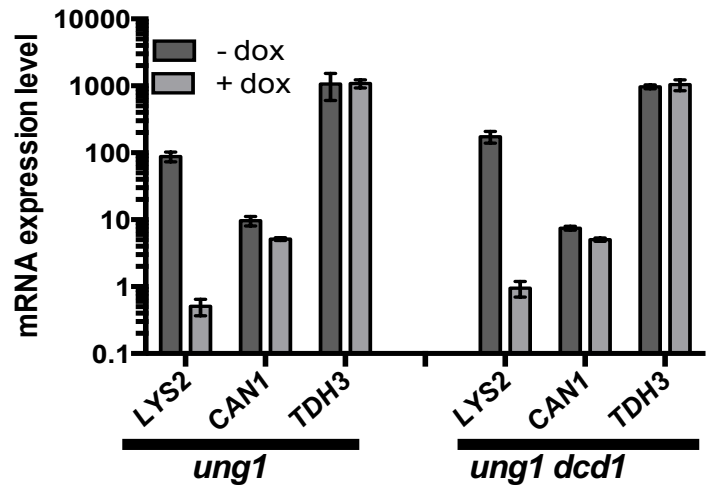

## C. Primer sets for long-QPCR

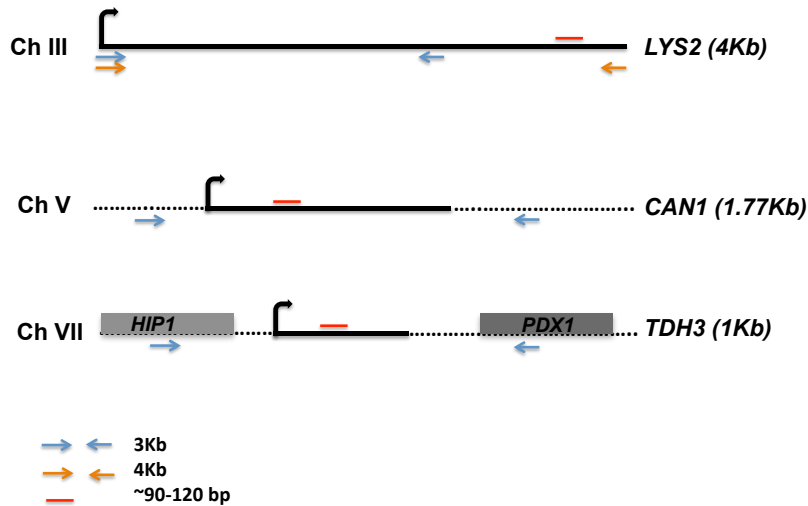

Supplement: pgen.1007516.s008.pdf [file pgen.1007516.s008.pdf]
