# Supplementary material for: Unscheduled DNA synthesis leads to elevated uracil residues at highly transcribed genomic loci in Saccharomyces cerevisiae
Source: PubMed Central journal article supplement (PMC6063437; doi:10.1371/journal.pgen.1007516), 2018-07-17

**Fig. S2**

**A>T mutation frequency**

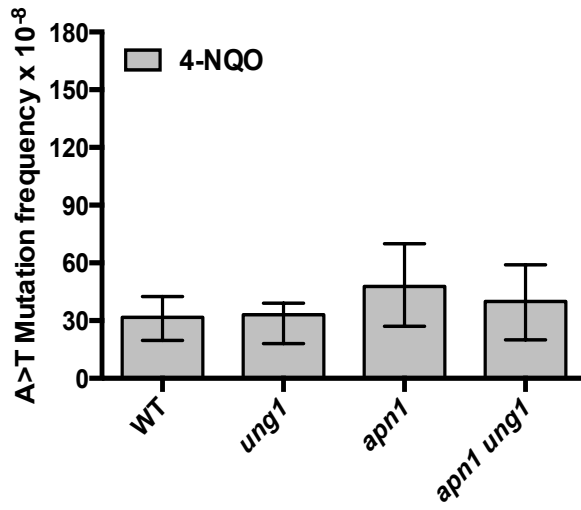

Supplement: pgen.1007516.s009.pdf [file pgen.1007516.s009.pdf]
