# Supplementary material for: Unscheduled DNA synthesis leads to elevated uracil residues at highly transcribed genomic loci in Saccharomyces cerevisiae
Source: PubMed Central journal article supplement (PMC6063437; doi:10.1371/journal.pgen.1007516), 2018-07-17
Supplement: pgen.1007516.s010.pdf [file pgen.1007516.s010.pdf]

# Fig. S3

## Schematic for AA3 labeling

DNA from *ung1Δ* strains

↓ + Methoxyamine

DNA with blocked AP sites

↓ + UDG

DNA with uracil-derived AP sites

↓ + AA3

AA3 labeled AP sites

↓ + Cy5 Azide  
(Click chemistry)

Cy5 labeled DNA
