# Supplementary material for: Unscheduled DNA synthesis leads to elevated uracil residues at highly transcribed genomic loci in Saccharomyces cerevisiae
Source: PubMed Central journal article supplement (PMC6063437; doi:10.1371/journal.pgen.1007516), 2018-07-17

# Fig. S4

## A. Genomic *DUT1* mRNA level

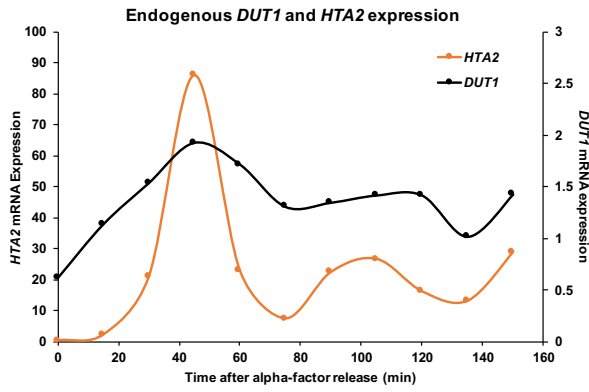

## B. Relative *DUT1* mRNA Expression (Asynchronous)

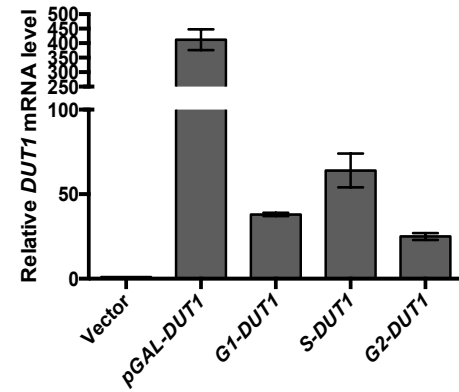

## C. G1-*DUT1* mRNA level

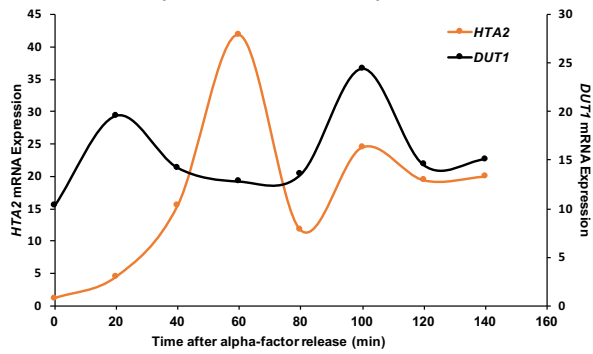

## D. S-*DUT1* mRNA level

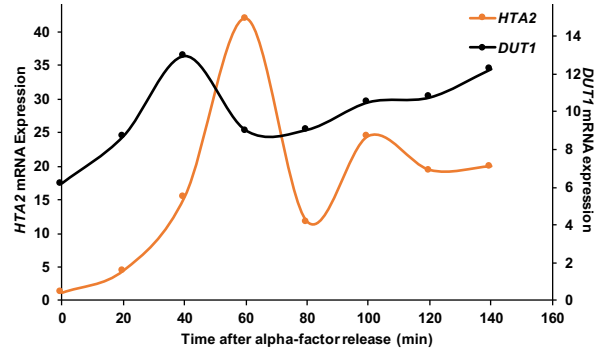

## E. G2-*DUT1* mRNA level

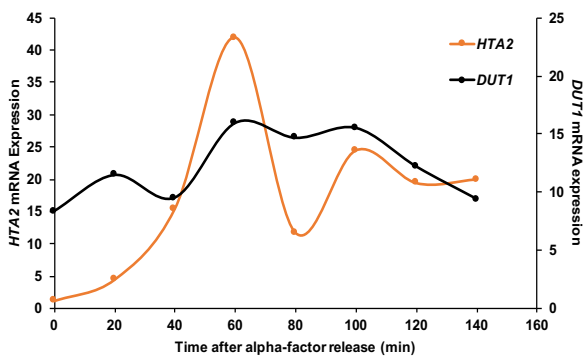

Supplement: pgen.1007516.s011.pdf [file pgen.1007516.s011.pdf]
